# Supplementary material for: Biofilm-Associated Agr and Sar Quorum Sensing Systems of Staphylococcus aureus Are Inhibited by 3-Hydroxybenzoic Acid Derived from Illicium verum
Source: PubMed Central journal article supplement — ACS Omega. 2022 Apr 20;7(17):14653–65. doi: 10.1021/acsomega.1c07178 (PMC9088959; doi:10.1021/acsomega.1c07178), 2022-04-20

## SUPPLEMENTARY FILE

### **Biofilm-Associated Agr and Sar Quorum Sensing Systems of *Staphylococcus aureus* are Inhibited by 3-Hydroxybenzoic Acid Derived from *Illicium verum***

**Pitchaipillai Sankar Ganesh<sup>1</sup>, Krishnamurthy Veena<sup>2</sup>, Renganathan Senthil<sup>3</sup>, Koneti Iswamy<sup>2</sup>, Esaki Muthu Ponmalar<sup>4</sup>, Vanitha Mariappan<sup>5†</sup>, A.S. Smiline Girija<sup>1</sup>, Jamuna Vadivelu<sup>6</sup>, Samuthira Nagarajan<sup>7</sup>, Dinakar Challabathula<sup>8</sup> and Esaki Muthu Shankar<sup>2†</sup>**

<sup>1</sup>Department of Microbiology, Saveetha Dental College and Hospital, Saveetha Institute of Medical and Technical Sciences (SIMATS), Velappanchavadi, PH Road, Chennai 600 077, Tamilnadu, India. <sup>2</sup>Infection Biology, Department of Life Sciences, Central University of Tamil Nadu, Neelakudi, Tiruvarur 610 005, Tamilnadu, India, <sup>3</sup>Department of Bioinformatics, Marudupandiyar College, Vallam, Thanjavur 613403, Tamilnadu, India, <sup>4</sup>Sri Sairam Siddha Medical College and Research Centre, West Tambaram, Chennai 600 044, Tamilnadu, India, <sup>5</sup>Center for Toxicology and Health Risk Studies, Faculty of Health Sciences, Universiti Kebangsaan Malaysia, 43600 Bangi, Selangor, Malaysia. <sup>6</sup>Department of Medical Microbiology, Faculty of Medicine, University of Malaya, Lembah Pantai, Kuala Lumpur 50603, Malaysia. <sup>7</sup>Department of Chemistry, Central University of Tamil Nadu, Neelakudi, Tiruvarur 610 005, Tamilnadu, India, <sup>8</sup>Department of Life Sciences, Central University of Tamil Nadu, , Neelakudi, Tiruvarur 610 005, Tamilnadu, India.

## Supplementary data

**Table S1:** Binding affinity calculated between AgrA from *Staphylococcus aureus* and phyto-constituents reported in GC-MS report

| C. ID  | Compound name            | Binding Affinity (kcal/mol) | Amino Acid                                                                             | Hydrogen Bonding       | H-Bond Length (Å)      | Hydrophobic Contacts                                                               |
|--------|--------------------------|-----------------------------|----------------------------------------------------------------------------------------|------------------------|------------------------|------------------------------------------------------------------------------------|
| 985    | Palmitic acid            | -3.9                        | ILE143, GLU144, LYS146, PHE182, TYR183, GLY184, ASN185, GLU188, LEU189&192             | ASN185                 | 3.58                   | ILE143, GLU144, LYS146, PHE182, TYR183, GLY184, GLU188, LEU189&192                 |
| 5281   | Octadecanoic acid        | -3.7                        | SER164&165, SER168, HIS169, ARG170, LEU171, ASN185, LEU186, LYS187, ARG198, ASN201     | SER164&165             | 3.08,<br>3.40          | SER168, HIS169, ARG170, LEU171, ASN185, LEU186, LYS187, ARG198, ASN201             |
| 7136   | Eugenol acetate          | -4.6                        | SER164&165, SER168, HIS169, ARG170, LEU171, ASN185, LEU186, LYS187, ARG198, ASN201     | LEU186, LYS187         | 4.22,<br>4.17          | SER164&165, SER168, HIS169, ARG170, LEU171, ASN185, LEU186, LYS187, ARG198, ASN201 |
| 7420   | 3-hydroxybenzoic acid    | -4.4                        | ILE143, GLU144, LEU145, LYS146, PHE182, TYR183, GLY184, ASN185, GLU188, LEU189, LEU192 | GLU144, ASN185         | 3.01,<br>3.12          | ILE143, LEU145, LYS146, PHE182, TYR183, GLY184, GLU188, LEU189, LEU192             |
| 11569  | Benzaldehyde, 3-methoxy- | -4                          | ILE143, GLU144, LEU145, LYS146, PHE182, TYR183, GLU188, LEU189, LEU192                 | GLU144                 | 4.09                   | ILE143, LEU145, LYS146, PHE182, TYR183, GLU188, LEU189, LEU192                     |
| 31244  | Benzaldehyde, 4-methoxy- | -3.8                        | SER164, LEU171, ASN185, LEU186, LYS187, ARG198                                         | SER164, LYS187, ARG198 | 4.28,<br>3.69,<br>5.59 | LEU171, ASN185, LEU186,                                                            |
| 61007  | Anisylacetone            | -4.6                        | ILE143, GLU144, LYS146, TYR156, PHE182, ASN185, GLU188, LEU189, LEU192                 | GLU144                 | 3.91                   | ILE143, LYS146, TYR156, PHE182, ASN185, GLU188, LEU189, LEU192                     |
| 86608  | alpha.-Cubebene          | -4.7                        | ILE143, GLU144, LEU145, LYS146, PHE182, TYR183, GLU188, LEU189, LEU192                 |                        |                        | ILE143, GLU144, LEU145, LYS146, PHE182, TYR183, GLU188, LEU189, LEU192             |
| 86609  | alpha.-Cubebene          | -5.2                        | THR142, ILE143, GLU144, LYS146, PHE182, TYR183, GLY184, GLU188, LEU189, LEU192         |                        |                        | THR142, ILE143, GLU144, LYS146, PHE182, TYR183, GLY184, GLU188, LEU189, LEU192     |
| 112056 | 4-Methoxymandelic acid   | -4.6                        | THR142, ILE143, GLU144, LYS146, PHE182, TYR183, GLY184, ASN185, GLU188, LEU189, LEU192 | GLU144, TYR183, ASN145 | 4.28,<br>6.98,<br>4.01 | THR142, ILE143, LYS146, PHE182, GLY184, GLU188, LEU189, LEU192                     |
| 519764 | Beta-Sesquiphellandrene  | -4.8                        | ILE143, GLU144, LYS146, PH                                                             |                        |                        | ILE143, GLU144, LYS146,                                                            |

|          |                                                           |      |                                                                                                |                        |                        |                                                                                        |
|----------|-----------------------------------------------------------|------|------------------------------------------------------------------------------------------------|------------------------|------------------------|----------------------------------------------------------------------------------------|
|          |                                                           |      | E182, TYR183, ASN185, GLU188, LEU189, LEU192                                                   |                        |                        | PHE182, TYR183, ASN185, GLU188, LEU189, LEU192                                         |
| 556368   | Tricyclo[4.3.1.0 2,5]decane                               | -4.7 | ILE143, GLU144, LEU145, LYS146, PHE182, TYR183, ASN185, GLU188, LEU189, LEU192                 |                        |                        | ILE143, GLU144, LEU145, LYS146, PHE182, TYR183, ASN185, GLU188, LEU189, LEU192         |
| 637563   | Anethole                                                  | -4.2 | THR142, ILE143, GLU144, TYR183, GLY184, ASN185, GLU188, LEU189, LEU192                         |                        |                        | THR142, ILE143, GLU144, TYR183, GLY184, ASN185, GLU188, LEU189, LEU192                 |
| 5317319  | (Z)-.beta.-Farnesene                                      | -4.2 | ILE143, GLU144, LEU145, LYS146, PHE182, TYR183, GLY184, ASN185, GLU188, LEU189, LEU192         |                        |                        | ILE143, GLU144, LEU145, LYS146, PHE182, TYR183, GLY184, ASN185, GLU188, LEU189, LEU192 |
| 5356544  | d-Nerolidol or Peruvicol                                  | -4.7 | THR142, ILE143, GLU144, LYS146, TYR154, PHE182, TYR183, ASN185, GLU188, LEU189, LEU192         |                        |                        | THR142, ILE143, GLU144, LYS146, TYR154, PHE182, TYR183, ASN185, GLU188, LEU189, LEU192 |
| 5365626  | (Z)6-Pentadecen-1-ol                                      | -3.7 | ILE143, GLU144, LEU145, LYS146, PHE182, TYR183, ASN185, GLU188, LEU189, LEU192                 | ASN185                 | 3.29                   | ILE143, GLU144, LEU145, LYS146, PHE182, TYR183, GLU188, LEU189, LEU192                 |
| 6429302  | trans-alpha-bergamotene                                   | -4.7 | ILE143, GLU144, LEU145, LYS146, PHE182, TYR183, ASN185, GLU188, LEU189, LEU192                 |                        |                        | ILE143, GLU144, LEU145, LYS146, PHE182, TYR183, ASN185, GLU188, LEU189, LEU192         |
| 10104370 | 1-methyl-4-(5-methyl-1-methylene-4-hexenyl)-1-cyclohexene | -5   | ILE143, GLU144, LEU145, LYS146, PHE182, TYR183, ASN185, GLU188, LEU189, LEU192                 |                        |                        | ILE143, GLU144, LEU145, LYS146, PHE182, TYR183, ASN185, GLU188, LEU189, LEU192         |
| 91746961 | Feniculin                                                 | -4.7 | THR142, ILE143, GLU144, LYS146, TYR156, PHE182, TYR183, ASN185, GLU188, LEU189, LEU192         | LYS146                 | 4.21                   | THR142, ILE143, GLU144, TYR156, PHE182, TYR183, ASN185, GLU188, LEU189, LEU192         |
|          | p-Methoxy-N-methyl-mandelic acid amide                    | -4.6 | THR142, ILE143, GLU144, LEU145, LYS146, TYR156, PHE182, TYR183, GLY184, GLU188, LEU189, LEU192 | GLU144, LYS146, TYR183 | 4.47,<br>4.23,<br>6.43 | THR142, ILE143, LEU145, TYR156, PHE182, GLY184, GLU188, LEU189, LEU192                 |

**Table S2:** Binding affinity calculated between SarA from *Staphylococcus aureus* and phyto-constituents reported in GC-MS report

| C. ID    | Name of the compounds    | Binding Affinity (kcal/mol) | Amino Acid                                                                                 | Hydrogen Bonding | H-Bond Length (Å) | Hydrophobic Contacts                                                                       |
|----------|--------------------------|-----------------------------|--------------------------------------------------------------------------------------------|------------------|-------------------|--------------------------------------------------------------------------------------------|
| 10104370 | Palmitic acid            | -4.8                        | TYR118,ALA119,LEU122,LYS123,ILE126,PHE134,PHE137,ILE215                                    |                  |                   | TYR118,ALA119,LEU122,LYS123,ILE126,PHE134,PHE137,ILE215                                    |
| 112056   | Octadecanoic acid        | -4.3                        | LYS121,SER124,LEU125,LYS128,ALA218,GLU221,ILE222                                           | GLU221           | 2.79,4.41         | LYS121,SER124,LEU125,LYS128,ALA218,ILE222                                                  |
| 11569    | Eugenol acetate          | -3.9                        | ALA119,LEU122,LYS123,ILE126,PHE134,PHE137,ILE215                                           |                  |                   | ALA119,LEU122,LYS123,ILE126,PHE134,PHE137,ILE215                                           |
| 31244    | 3-hydroxybenzoic acid    | -4.1                        | LYS121,SER124,LEU125,LYS128,GLU221,ILE222                                                  | GLU129,ARG210    | 3.22,3.10         | LYS121,SER124,LEU125,LYS128,GLU221,ILE222                                                  |
| 519764   | Benzaldehyde, 3-methoxy- | -4.7                        | TYR118,ALA119,LEU122,LYS123,ILE126,PHE134,PHE137,ILE215                                    |                  |                   | THR118,ALA119,LEU122,LYS123,ILE126,PHE134,PHE137,ILE215                                    |
| 5281     | Benzaldehyde,4-methoxy-  | -4.2                        | TYR118,ALA119,LEU122,LYS123,ILE126,PHE134,PHE137,ALA138,THR141,GLU145,LEU160,ILE215        | GLU145           | 5.46              | TYR118,ALA119,LEU122,LYS123,ILE126,PHE134,PHE137,ALA138,THR141,LEU160,ILE215               |
| 5317319  | Anisylacetone            | -4.4                        | MET115,TYR118,ALA119,LEU122,LYS123,ILE126,PHE134,PHE137,ALA138,THR141,GLU145,LEU160,ILE215 |                  |                   | MET115,TYR118,ALA119,LEU122,LYS123,ILE126,PHE134,PHE137,ALA138,THR141,GLU145,LEU160,ILE215 |
| 5356544  | alpha.-Cubebene          | -4.8                        | MET115,TYR118,ALA119,LEU122,LYS123,ILE126,PHE134,PHE137,ALA138,THR141,GLU145,LEU160,ILE215 |                  |                   | MET115,TYR118,ALA119,LEU122,LYS123,ILE126,PHE134,PHE137,ALA138,THR141,GLU145,LEU160,ILE215 |
| 5365626  | alpha.-Cubebene          | -4.1                        | MET115,TYR118,ALA119,LEU122,LYS123,ILE126,PHE134,PHE137,ALA138,THR141,TYR142,LEU160,ILE215 |                  |                   | MET115,TYR118,ALA119,LEU122,LYS123,ILE126,PHE134,PHE137,ALA138,THR141,TYR142,LEU160,ILE215 |
| 556368   | 4-Methoxymandelic acid   | -4.9                        | ALA119,LEU122,LYS123,ILE126,PHE134,PHE137                                                  |                  |                   | ALA119,LEU122,LYS123,ILE126,PHE134,PHE137                                                  |

|          |                                                           |      |                                                                              |        |      |                                                                              |
|----------|-----------------------------------------------------------|------|------------------------------------------------------------------------------|--------|------|------------------------------------------------------------------------------|
|          |                                                           |      | 7,ILE215                                                                     |        |      | 3,ILE126,PHE134,PHE137,ILE215                                                |
| 61007    | Beta-Sesquiphellandrene                                   | -4.3 | LYS121,SER124,LEU125,LYS128,GLU221,ILE222,GLU223                             | LYS128 | 4.51 | LYS121,SER124,LEU125,LYS128,GLU221,ILE222,GLU223                             |
| 637563   | Tricyclo[4.3.1.0 2,5]decane                               | -4.5 | TYR118,ALA119,LEU122,LYS123,ILE126,PHE134,PHE137,ILE215                      |        |      | TYR118,ALA119,LEU122,LYS123,ILE126,PHE134,PHE137,ILE215                      |
| 6429302  | Anethole                                                  | -5.7 | ALA119,ASP120,LEU122,LYS123,ILE126,PHE134,PHE137,ILE215                      |        |      | ALA119,ASP120,LEU122,LYS123,ILE126,PHE134,PHE137,ILE215                      |
| 7136     | (Z)-.beta.-Farnesene                                      | -4.9 | LYS121,SER124,LEU125,LYS128,GLU221,ILE222,GLU223                             | LYS128 | 4.39 | LYS121,SER124,LEU125,LYS128,GLU221,ILE222,GLU223                             |
| 7420     | d-Nerolidol or Peruvial                                   | -4.1 | GLU129,PHE130,ARG210,LYS213,ARG214,GLU217                                    | ARG210 | 4.90 | GLU129,PHE130,ARG210,LYS213,ARG214,GLU217                                    |
| 86608    | (Z)6-Pentadecen-1-ol                                      | -5.7 | ALA119,LEU122,LYS123,ILE126,PHE134,PHE137,ILE215                             |        |      | ALA119,LEU122,LYS123,ILE126,PHE134,PHE137,ILE215                             |
| 86609    | trans-alpha-bergamotene                                   | -5.4 | ALA119,LEU122,LYS123,ILE126,PHE134,PHE137,ILE215                             |        |      | ALA119,LEU122,LYS123,ILE126,PHE134,PHE137,ILE215                             |
| 91746961 | 1-methyl-4-(5-methyl-1-methylene-4-hexenyl)-1-cyclohexene | -5.2 | LYS121,SER124,LEU125,LYS128,GLU129,GLU221,ILE222,GLU223                      |        |      | LYS121,SER124,LEU125,LYS128,GLU129,GLU221,ILE222,GLU223                      |
| 985      | Feniculin                                                 | -4   | TYR118,ALA119,LEU122,LYS123,ILE126,PHE134,PHE137,ALA138,THR141,TYR162,ILE215 |        |      | TYR118,ALA119,LEU122,LYS123,ILE126,PHE134,PHE137,ALA138,THR141,TYR162,ILE215 |
|          | p-Methoxy-N-methyl-mandelic acid amide                    | -4.3 | LYS121,SER124,LEU125,LYS128,ALA218,GLU221,ILE222,GLU223                      | GLU221 | 4.07 | LYS121,SER124,LEU125,LYS128,ALA218,ILE222,GLU223                             |

**Table S3:** Antibiogram profiles of *S. aureus* (SA-01) and *S. aureus* (SA-02) strains employed in the investigation.

| S. No | Antibiotics     | SA-01     |     | SA-02       |     |
|-------|-----------------|-----------|-----|-------------|-----|
|       |                 | SD value  | R/S | SD value    | R/S |
| 1     | Penicillin G    | -         | R   | 31.3 ± 1.1  | S   |
| 2     | Methicillin     | -         | R   | 24 ± 1.15   | S   |
| 3     | Amoxycillin     | -         | R   | 36.3 ± 0.5  | S   |
| 4     | Ampicillin      | 0.8 ± 0.1 | R   | 34.1 ± 0.15 | S   |
| 5     | Colistin        | -         | R   | -           | R   |
| 6     | Tigecycline     | 15.6±0.5  | IM  | 20.6±0.5    | S   |
| 7     | Imipenem        | 10±0      | R   | 11±1.73     | R   |
| 8     | Kanamycin       | -         | R   | 19±1        | S   |
| 9     | Ciprofloxacin   | -         | R   | 8.6±0.5     | R   |
| 10    | Streptomycin    | -         | R   | 14±0        | IM  |
| 11    | Ceftazidime     | -         | R   | 12.6±0.5    | R   |
| 12    | Cephalothin     | -         | R   | 38.8±1.04   | S   |
| 13    | Chloramphenicol | 16±1.7    | R   | 19±0        | S   |
| 14    | Gentamicin      |           | R   | 20.3±0.5    | S   |

Note: “R”- Resistant, “S”- Sensitive, “IM”- Intermediate, SD

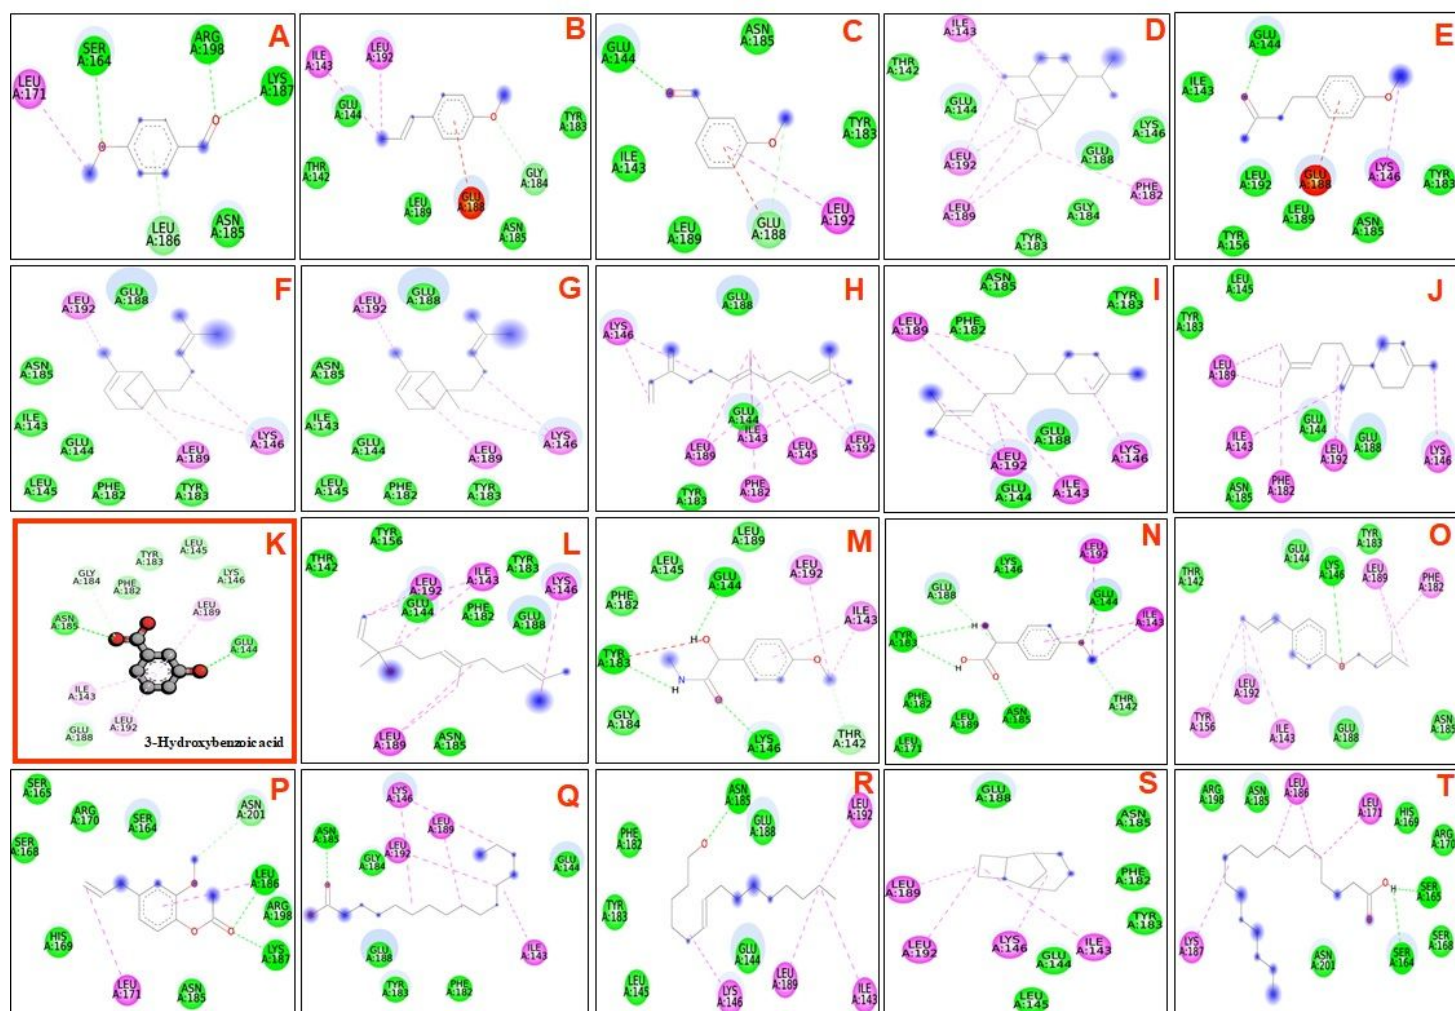

**Figure S1.3**-Hydroxybenzoic acid bound binding site amino acids (AA) in AgrA protein were shown in 2D interaction. Amino acids were colored and represented as its role in biochemical reaction with small molecules. Hydrogen bonding and hydrophobic interaction in protein complex was modeled and revealed by dashed lines. **(A)** Benzaldehyde,4-methoxy-, **(B)** Anethole, **(C)** Benzaldehyde, **(D)** 3-methoxy-, alpha.-Cubebene, **(E)** Anisylacetone, **(F)** alpha-bergamotene, **(G)** trans-alpha-bergamotene, **(H)** (Z)-.beta.-Farnesene, **(I)** Beta-Sesquiphellandrene, **(J)** 1-methyl-4-(5-methyl-1-methylene-4-hexenyl)-1-cyclohexene, **(K)** 3-hydroxybenzoic acid (Ball and stick), **(L)** d-Nerolidol or Peruviol, **(M)** p-Methoxy-N-methyl-mandelic acid amide, **(N)** 4-Methoxymandelic acid, **(O)** Feniculin, **(P)** Eugenol acetate, **(Q)** Palmitic acid, **(R)** (Z)6-Pentadecen-1-ol, **(S)** Tricyclo[4.3.1.0 2,5]decane, **(T)** Octadecanoic acid.

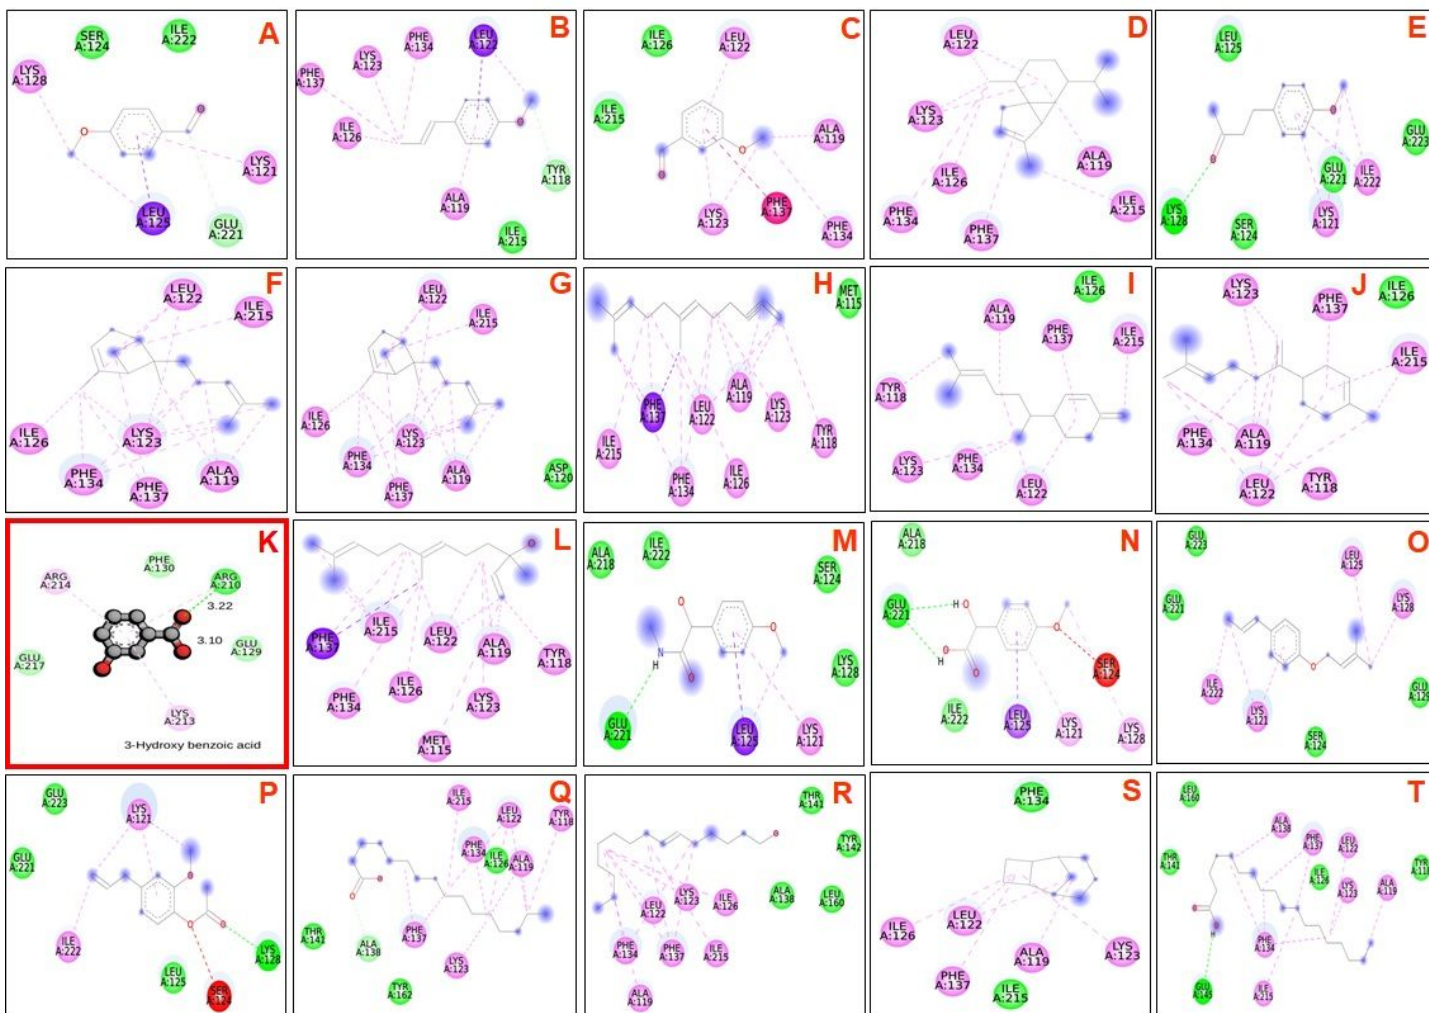

**Figure S2.** 3-Hydroxybenzoic acid interacting amino acids (AA) in SarA protein were shown in 2D interaction. Amino acids were colored and represented as its role in biochemical reaction with small molecules. Hydrogen bonding and hydrophobic interaction in protein complex was modeled and revealed by dashed lines. **(A)** Benzaldehyde,4-methoxy-, **(B)** Anethole, **(C)** Benzaldehyde, **(D)** 3-methoxy-, alpha.-Cubebene, **(E)** Anisylacetone, **(F)** alpha-bergamotene, **(G)** trans-alpha-bergamotene, **(H)** (Z)-.beta.-Farnesene, **(I)** Beta-Sesquiphellandrene, **(J)** 1-methyl-4-(5-methyl-1-methylene-4-hexenyl)-1-cyclohexene, **(K)** 3-hydroxybenzoic acid (Ball and stick), **(L)** d-Nerolidol or Peruviol, **(M)** p-Methoxy-N-methyl-mandelic acid amide, **(N)** 4-Methoxymandelic acid, **(O)** Feniculin, **(P)** Eugenol acetate, **(Q)** Palmitic acid, **(R)** (Z)6-Pentadecen-1-ol, **(S)** Tricyclo[4.3.1.0 2,5]decane, **(T)** Octadecanoic acid.



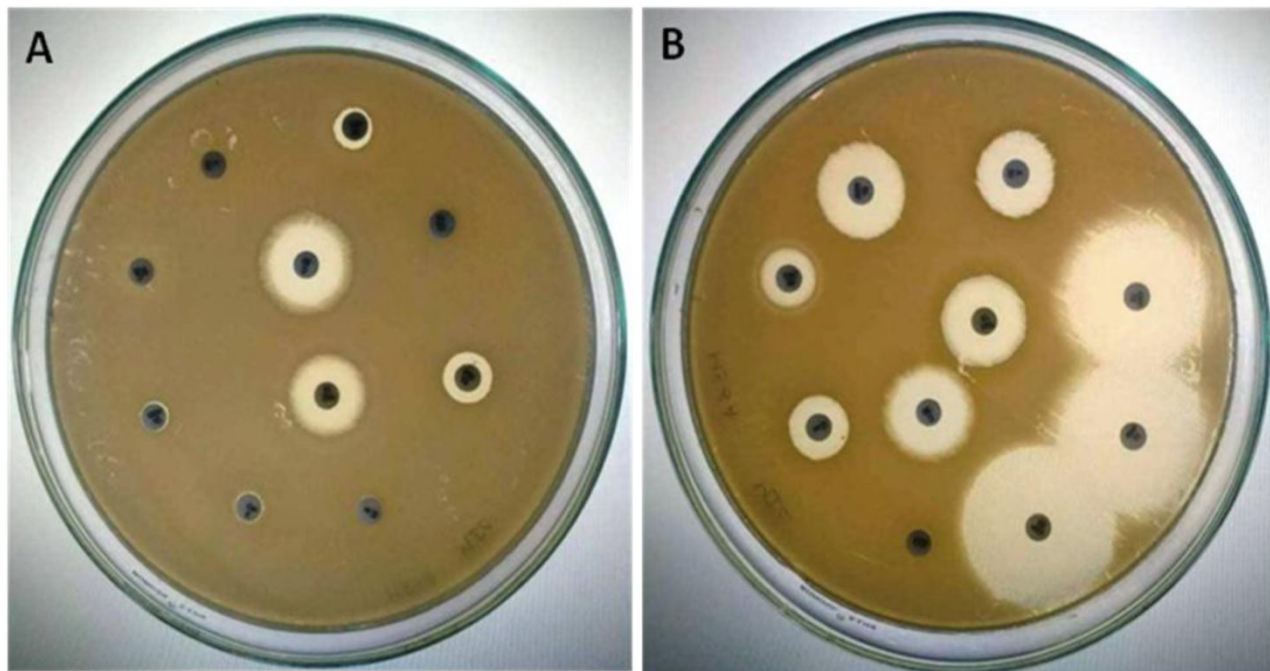

**Figure S3:** Antibiogram profile of test *S. aureus* strains by Kirby–Bauer disk diffusion method. A) *S. aureus* SA-01 B) *S. aureus* SA-02.

**Figure S4:** Electrospray ion chromatogram and mass spectrum of methanol extract of *I. verum* constituents (Peak # 1 to 20) as analyzed by GC-MS.

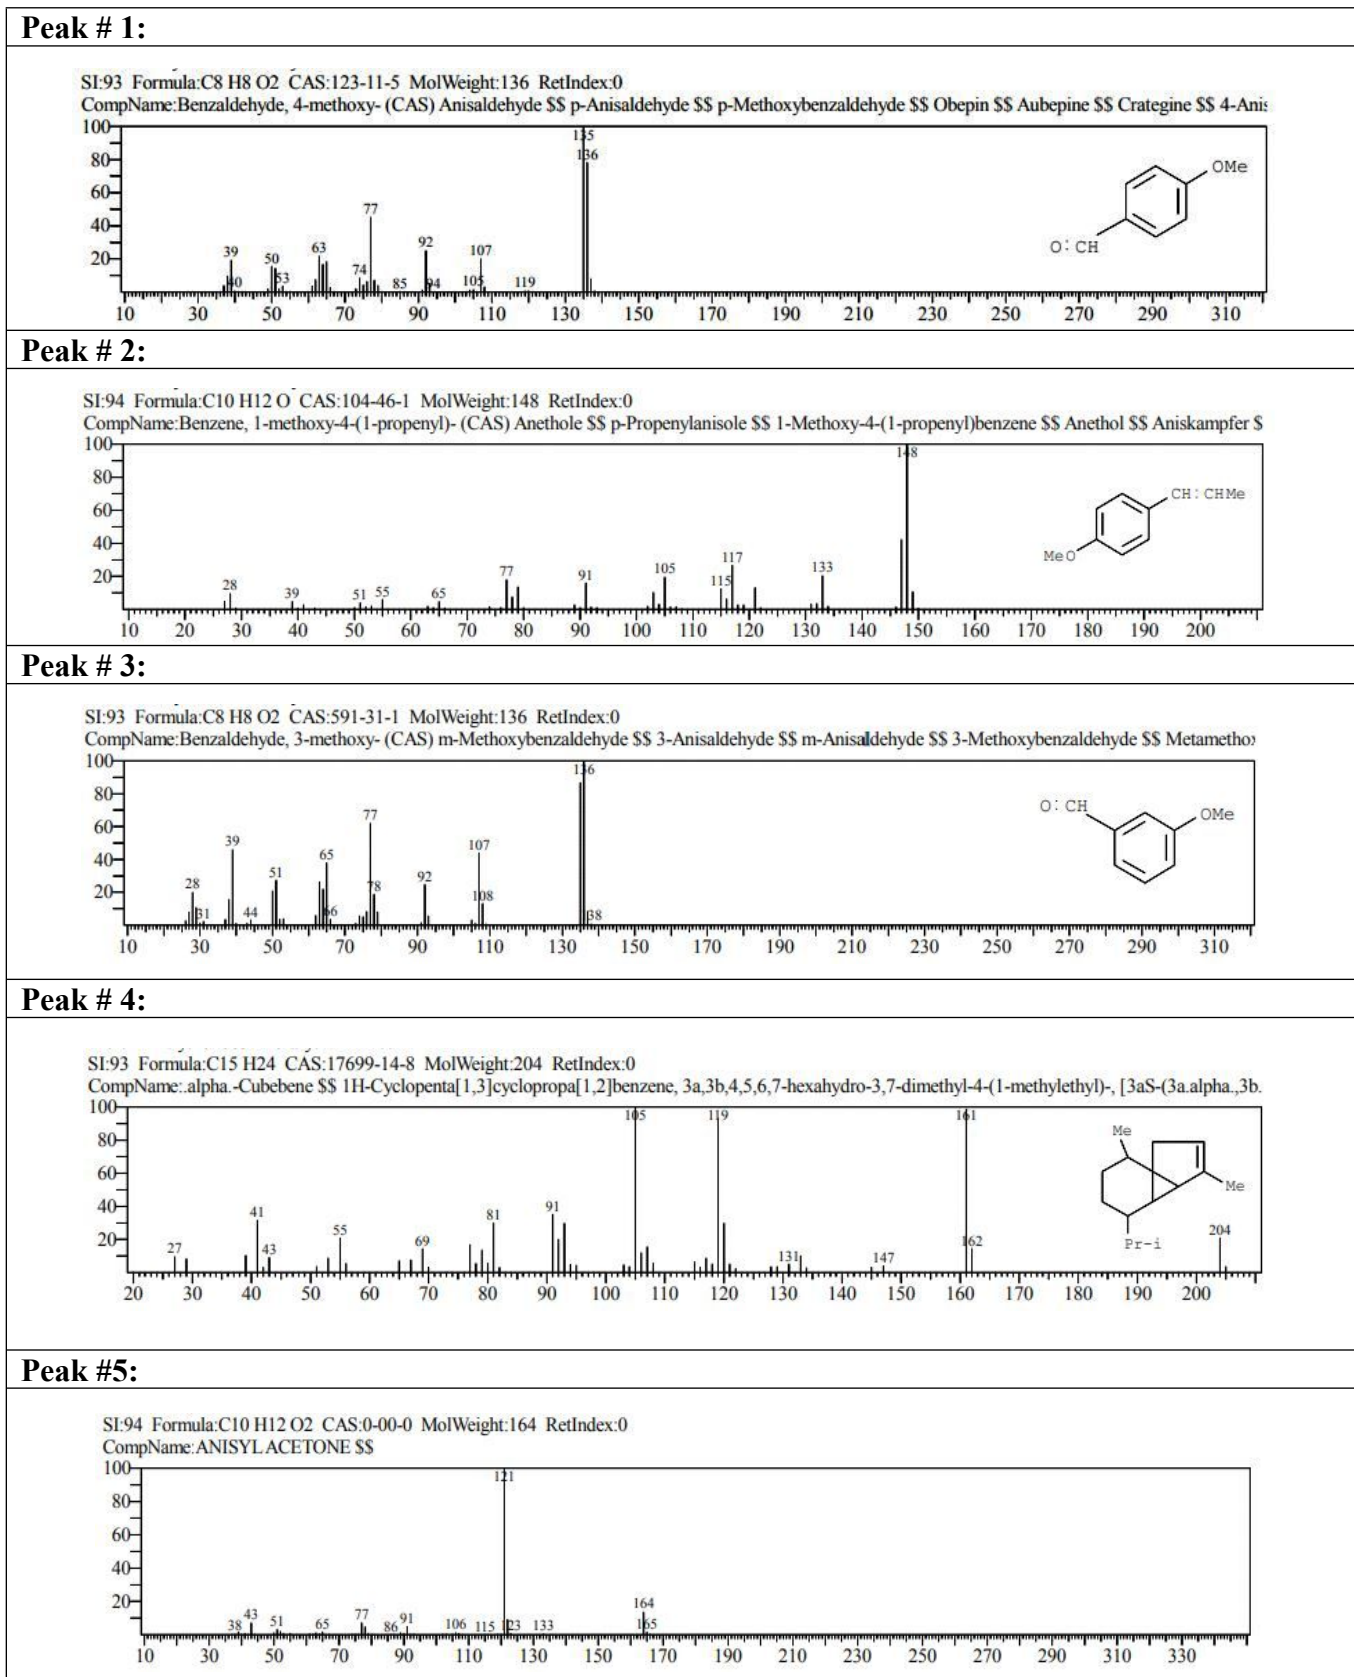

### Peak # 6:

SI:96 Formula:C15 H24 CAS:17699-05-7 MolWeight:204 RetIndex:0  
CompName:alpha.-Bergamotene \$\$ Bicyclo[3.1.1]hept-2-ene, 2,6-dimethyl-6-(4-methyl-3-pentenyl)- (CAS) 2-Norpinene, 2,6-dimethyl-6-(4-methyl-3-pente

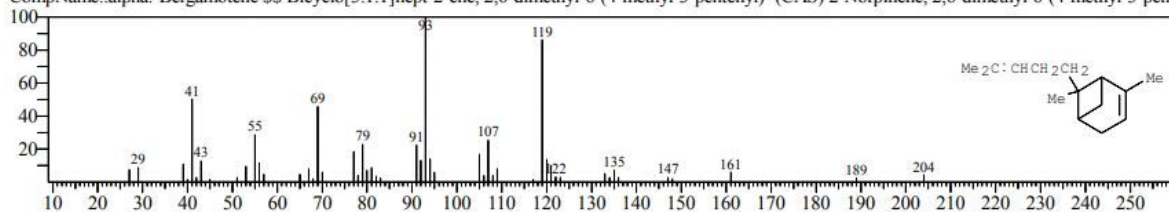

### Peak #7:

SI:91 Formula:C15 H24 CAS:13474-59-4 MolWeight:204 RetIndex:0  
CompName:TRANS-.ALPHA.-BERGAMOTENE \$\$ Bergamotene \$\$ trans- alpha.-Bergamotene \$\$ Bicyclo[3.1.1]hept-2-ene, 2,6-dimethyl-6-(4-methyl-3-

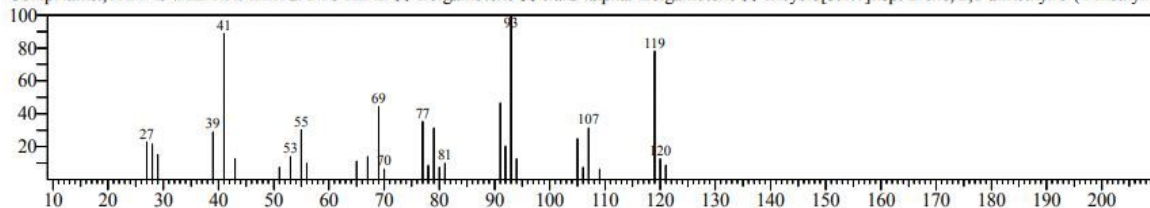

### Peak # 8:

SI:89 Formula:C15 H24 CAS:28973-97-9 MolWeight:204 RetIndex:0  
CompName:(Z)-.beta.-Farnesene \$\$ 1,6,10-Dodecatriene, 7,11-dimethyl-3-methylene-, (Z)- (CAS) cis-.beta.-Farnesene \$\$

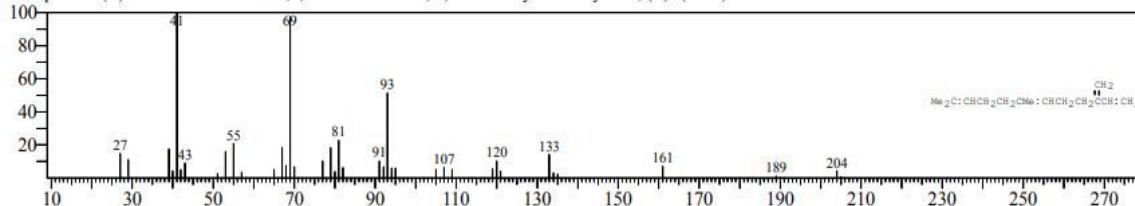

### Peak # 9:

SI:85 Formula:C15 H24 CAS:20307-83-9 MolWeight:204 RetIndex:0  
CompName:.beta.-Sesquiphellandrene (CAS) 2-METHYL-6-(4-METHYLENOCYCLOHEX-2-ENYL)-2-HEPTENE \$\$ BETA-SESQUIPELLANDRENE

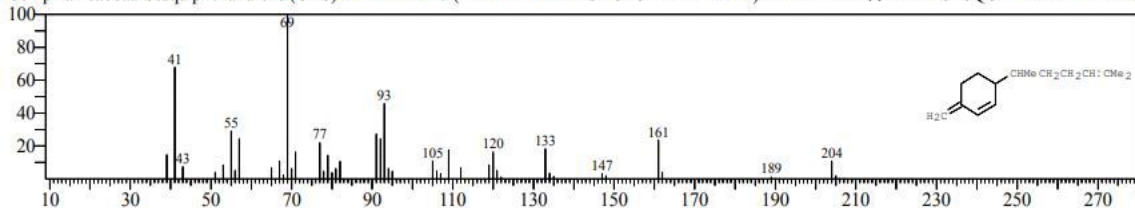

### Peak #10:

SI:85 Formula:C15H24 CAS:0-00-0 MolWeight:204 RetIndex:0  
CompName:1-METHYL-4-(5-METHYL-1-METHYLENE-4-HEXENYL)-1-CYCLOHEXENE \$\$ BETA-BISABOLEN

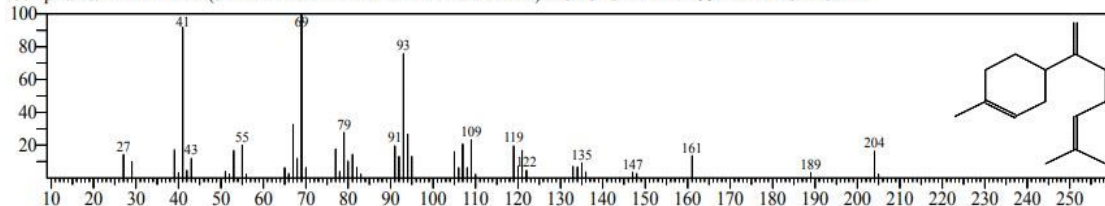

**Peak # 11:**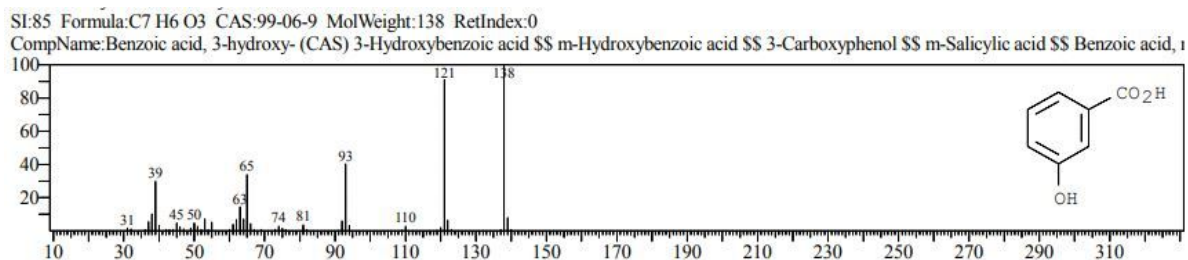**Peak # 12:**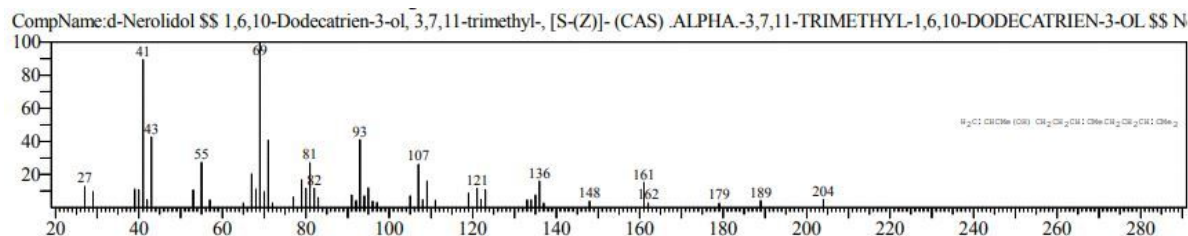**Peak #13:**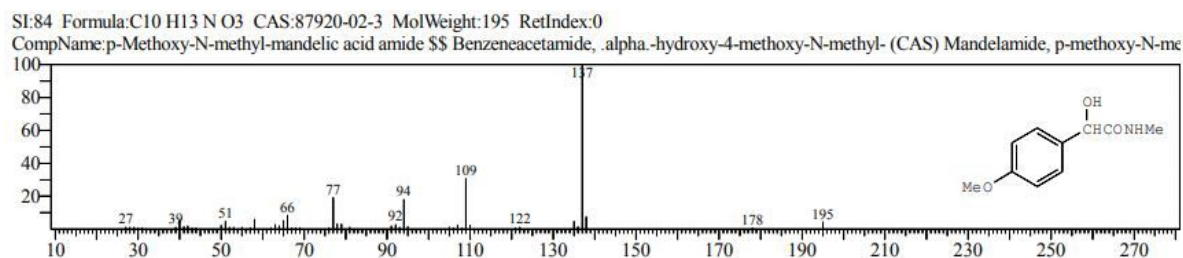**Peak # 14:**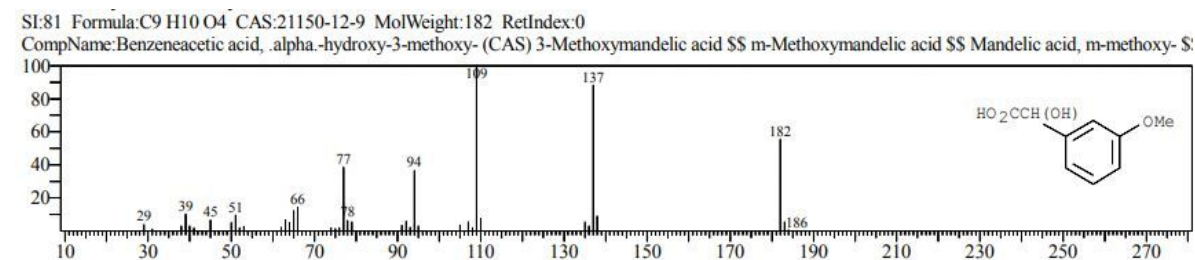**Peak #15:**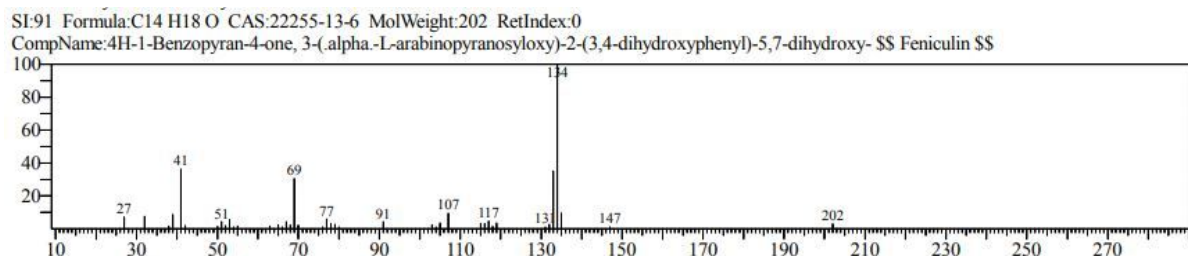

**Peak # 16:**

SI:70 Formula:C12 H14 O3 CAS:93-28-7 MolWeight:206 RetIndex:0  
CompName:Phenol, 2-methoxy-4-(2-propenyl)-, acetate (CAS) Aceteugenol \$\$ Acetyeugenol \$\$ Eugenol acetate \$\$ Eugenyl acetate \$\$ 1,3,4-Eugenol acet

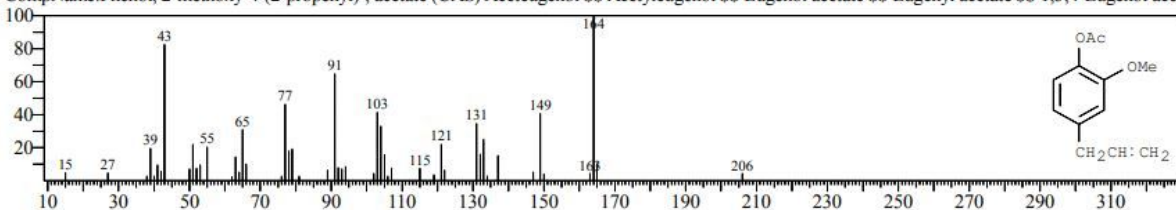**Peak # 17:**

SI:95 Formula:C16 H32 O2 CAS:57-10-3 MolWeight:256 RetIndex:0  
CompName:Hexadecanoic acid (CAS) Palmitic acid \$\$ Palmitinic acid \$\$ n-Hexadecanoic acid \$\$ n-Hexadecanoic acid \$\$ Pentadecanecarboxylic acid \$\$ 1-F

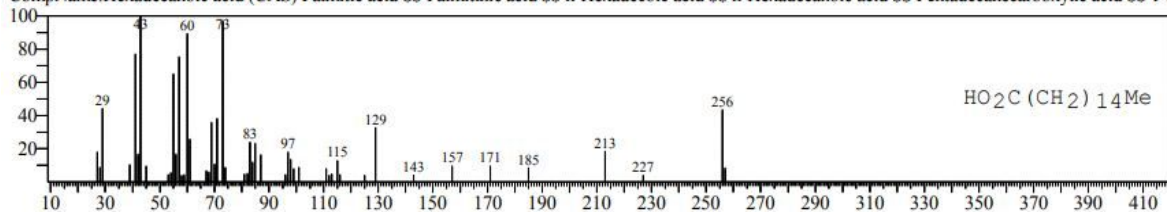**Peak # 18:**

SI:91 Formula:C15 H30 O CAS:68797-95-5 MolWeight:226 RetIndex:0  
CompName:(Z)-6-Pentadecen-1-ol \$\$

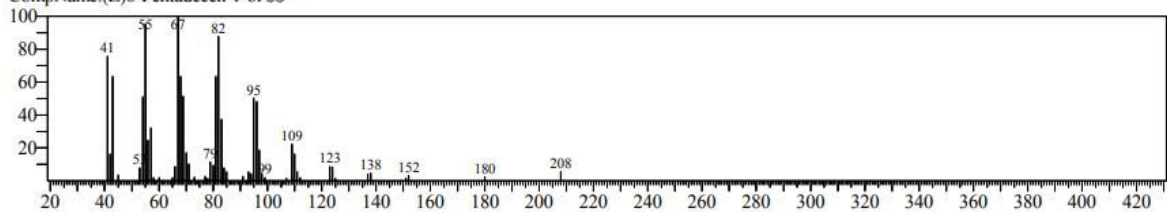**Peak # 19:**

SI:85 Formula:C10H16 CAS:0-00-0 MolWeight:136 RetIndex:0  
CompName:TRICYCLO[4.3.1.0 2,5]DECANE \$\$ TRICYCLO[4.3.1.0~2,5~]DECANE

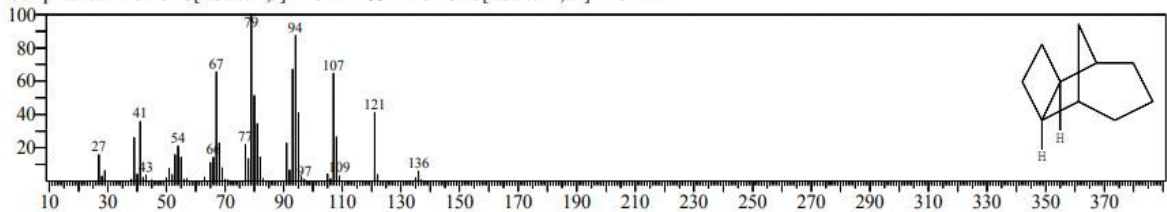**Peak # 20:**

SI:94 Formula:C18H36O2 CAS:57-11-4 MolWeight:284 RetIndex:0  
CompName:OCTADECANOIC ACID \$\$ STEARATE \$\$ STEARIC ACID \$\$ 1-HEPTADECANECARBOXYLIC ACID \$\$ 1-HEPTADECANECARBOX

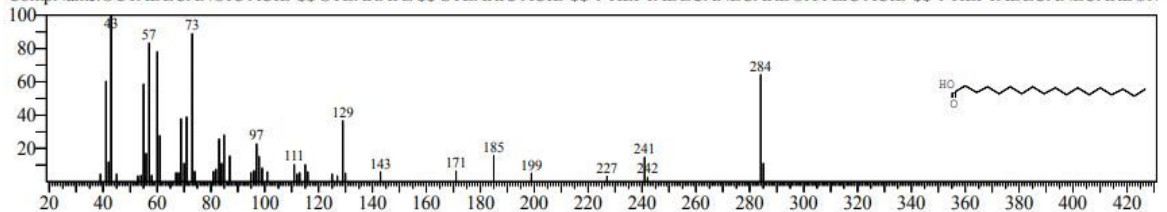

Supplement: ao1c07178_si_001.pdf [file ao1c07178_si_001.pdf]
